# Supplementary material
Source: PubMed Central journal article supplement (PMC2453078)

## Supplemental Figure 1

Validation of the antibody raised against extracellular loop sequence of croaker GPR30 protein

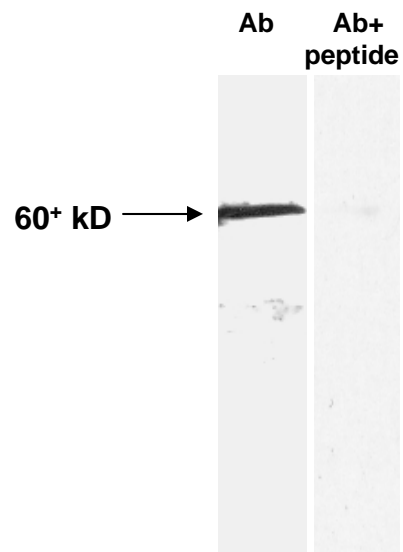

Supplement: en.2007-1663_1.pdf [file en.2007-1663_1.pdf]
